# Supplementary material for: A Modeled High-Density Fed-Batch Culture Improves Biomass Growth and β-Glucans Accumulation in Microchloropsis salina
Source: MDPI journal article supplement (doi:10.3390/plants11233229), 2022-11-25
Supplement: s1 [file s1]

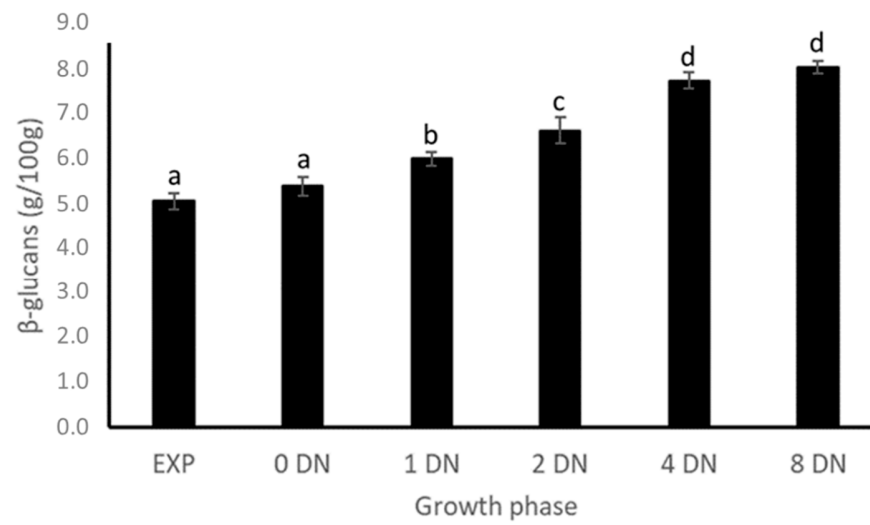

**Supplementary Figure S1:** Characterization of β-glucan production in high-density cultures of *M. salina* in different growth stages. The panels show the production of β-glucans in an exponential phase and at 0, 1, 2, 4, and 8 days after the total exhaustion of nitrogen in the culture medium, expressed in a percentage relation by the dry biomass of microalgae. ANOVA statistical analysis were performed ( $p < 0.05$ ), “a”, “b”, “c”, and “d” denotes significant differences between groups.
