# Supplementary material for: A Modeled High-Density Fed-Batch Culture Improves Biomass Growth and β-Glucans Accumulation in Microchloropsis salina
Source: Plants (Basel). 2022 Nov 25;11(23):3229. doi: 10.3390/plants11233229 (PMC9738629; doi:10.3390/plants11233229)
Supplement: Supplementary file 1 [file plants-11-03229-s001.zip › Raw data Ocaranza et al..xlsx]

## Sheet: Figure 1
	Biomass g/L
	Days	sample 1	sample 2	sample 3	Av	SD
	0	0.076	0.082	0.087	0.0816667	0.00449691
	1	0.146	0.192	0.171	0.169667	0.0188031
	2	0.163	0.231	0.183	0.192333	0.0285346
	3	0.216	0.273	0.243	0.244	0.0232809
	4	0.271	0.311	0.281	0.287667	0.0169967
	5	0.281	0.349	0.325	0.318333	0.0281583
	6	0.382	0.432	0.476	0.43	0.0384014
	7	0.458	0.493	0.564	0.505	0.0440984
	8	0.532	0.573	0.599	0.568	0.0275802
	9	0.588	0.613	0.606	0.602333	0.0105304
	10	0.609	0.601	0.612	0.607333	0.0046428
	11	0.619	0.585	0.622	0.608667	0.0167796
	12	0.602	0.603	0.644	0.616333	0.0195675
	nitrates
	Days	sample 1	sample 2	sample 3	Av	SD
	0	81.6712	82.5369	83.1531	82.4537	0.607847
	1	61.1977	61.2977	61.3781	61.2912	0.0737867
	2	27.5288	29.5673	27.2536	28.1166	1.03196
	3	5.28846	3.84615	2.37923	3.83795	1.1877
	4	1.20192	1.20192	1.20192	1.20192	0
	5	1.20192	1.20192	1.20192	1.20192	0
	6	1.20192	1.20192	1.20192	1.20192	0
	7	1.20192	1.20192	1.20192	1.20192	0
	8	1.20192	1.20192	1.20192	1.20192	0
	9	1.20192	1.20192	1.20192	1.20192	0
	10	1.20192	1.20192	1.20192	1.20192	0
	11	1.20192	1.20192	1.20192	1.20192	0
	12	1.20192	1.20192	1.20192	1.20192	0

## Sheet: Figure 2
	Biomass g/L
	Days	sample 1	sample 2	sample 3	Av	SD
	0	0.08	0.08	0.08	0.08	0
	3	0.18	0.22	0.166	0.188667	0.0228813
	6	0.433	0.42	0.39	0.414333	0.0180062
	9	0.633	0.666	0.633	0.644	0.0155563
	12	0.966	0.901	1	0.955667	0.0410718
	15	1.08	1.04	1.08	1.06667	0.0188562
	18	1.18	1.16	1.16	1.16667	0.00942809
	21	1.44	1.42	1.46	1.44	0.0163299
	24	1.68	1.7	1.76	1.71333	0.0339935
	27	2.1	2.04	1.98	2.04	0.0489898
	nitrates
	Days	sample 1	sample 2	sample 3	Av	SD
	0	79.3269	81.9712	82.4519	81.25	1.37391
	1	75.9615	76.9231	75.4808	76.1218	0.599625
	2	53.125	45.1923	47.1154	48.4776	3.37871
	3	28.8462	30.2885	28.125	29.0865	0.899437
	4	87.5	87.7404	81.0096	85.4167	3.1178
	6	5.04808	3.60577	4.80769	4.48718	0.63093
	7	81.7308	79.8077	80.0481	80.5288	0.855535
	9	6.49038	6.73077	6.73077	6.65064	0.113318
	10	74.7596	76.4423	74.0385	75.0801	1.0072
	12	1.20192	1.20192	1.20192	1.20192	0
	13	84.1346	83.8942	80.2885	82.7724	1.75917
	15	1.20192	1.20192	1.20192	1.20192	0
	16	85.3365	84.6154	82.9327	84.2949	1.0072
	18	1.20192	1.20192	1.20192	1.20192	0
	19	83.4135	84.8558	84.6154	84.2949	0.63093
	20	1.20192	1.20192	1.20192	1.20192	0
	21	84.8558	83.6538	84.8558	84.4551	0.566592
	22	1.20192	1.20192	1.20192	1.20192	0
	23	84.8558	84.6154	81.9712	83.8141	1.30685
	24	1.20192	1.20192	1.20192	1.20192	0
	25	80.2885	97.1154	77.8846	85.0962	8.55535
	26	79.0865	95.9135	73.5577	82.8526	9.50727
	27	78.8462	95.4327	73.3173	82.5321	9.39723

## Sheet: Figure 3
	Biomass g/L
	Days	sample 1	sample 2	sample 3	Av	SD
	0	0.084	0.082	0.087	0.0843333	0.0020548
	2	0.11	0.13	0.12	0.12	0.00816497
	4	0.13	0.15	0.12	0.133333	0.0124722
	6	0.15	0.15	0.14	0.146667	0.00471405
	8	0.17	0.17	0.16	0.166667	0.00471405
	10	0.24	0.23	0.25	0.24	0.00816497
	12	0.36	0.36	0.34	0.353333	0.00942809
	14	0.53	0.55	0.55	0.543333	0.00942809
	16	0.63	0.6	0.65	0.626667	0.020548
	18	0.78	0.79	0.7	0.756667	0.0402768
	22	0.95	0.93	0.95	0.943333	0.00942809
	24	1.08	1.1	1.09	1.09	0.00816497
	26	1.35	1.33	1.36	1.34667	0.0124722
	28	1.48	1.39	1.48	1.45	0.0424264
	31	1.53	1.55	1.56	1.54667	0.0124722
	32	1.62	1.64	1.63	1.63	0.00816497
	33	1.75	1.69	1.66	1.7	0.0374166
	34	1.78	1.73	1.7	1.73667	0.0329983
	35	1.87	1.78	1.81	1.82	0.0374166
	36	1.88	1.89	1.89	1.88667	0.00471405
	39	2.13	2.01	1.92	2.02	0.0860233
	40	2.2	2.12	2.08	2.13333	0.0498888
	nitrates
	Days	sample 1	sample 2	sample 3	Av	SD
	0	711.923	769.231	743.268	741.474	23.4301
	1	658.894	650.962	649.239	653.032	4.20475
	2	629.808	632.933	631.324	631.355	1.27596
	3	602.163	623.077	621.324	615.522	9.47265
	4	578.125	601.202	583.21	587.512	9.90013
	6	581.971	578.606	582.013	580.863	1.59648
	7	558.654	555.529	559.912	558.031	1.84265
	11	548.798	549.279	550.214	549.43	0.587829
	12	447.837	448.317	453.121	449.758	2.38586
	13	418.99	419.952	420.325	419.756	0.562225
	14	391.827	393.269	392.234	392.443	0.607147
	16	369.712	366.587	367.33	367.876	1.33295
	18	317.548	313.942	317.12	316.204	1.60848
	22	286.298	280.769	289.098	285.389	3.46059
	23	206.971	210.337	212.013	209.774	2.09645
	25	201.923	200.24	200.03	200.731	0.847229
	28	173.798	179.087	176.45	176.445	2.15901
	31	103.365	113.702	107.328	108.132	4.25795
	32	88.2212	95.9135	96.5948	93.5765	3.79699
	33	54.3269	64.1827	63.3295	60.613	4.45858
	34	36.0577	41.5865	42.4933	40.0458	2.84424
	35	16.1058	23.5577	25.7668	21.8101	4.13315
	36	1.20192	1.20192	1.20192	1.20192	0
	39	1.20192	1.20192	1.20192	1.20192	0
	40	1.20192	1.20192	1.20192	1.20192	0

## Sheet: Figure 4
	Biomass g/L
	Days	sample 1	sample 2	Av	SD
	0	0.08	0.08	0.08	0
	2	0.16	0.14	0.15	0.01
	3	0.25	0.26	0.255	0.005
	4	0.37	0.43	0.4	0.03
	5	0.49	0.55	0.52	0.03
	7	0.63	0.7	0.665	0.035
	9	0.75	0.83	0.79	0.04
	10	0.84	0.88	0.86	0.02
	11	0.98	1.19	1.085	0.105
	12	1.09	1.3	1.195	0.105
	14	1.23	1.31	1.27	0.04
	15	1.36	1.38	1.37	0.01
	16	1.41	1.5	1.455	0.045
	17	1.5	1.58	1.54	0.04
	18	1.63	1.68	1.655	0.025
	19	1.7	1.78	1.74	0.04
	21	1.79	1.87	1.83	0.04
	22	1.81	1.9	1.855	0.045
	23	1.85	1.95	1.9	0.05
	24	1.89	1.97	1.93	0.04
	25	1.94	2.1	2.02	0.08
	26	2.01	2.18	2.095	0.085
	28	2.19	2.22	2.205	0.015
	30	2.25	2.37	2.31	0.06
	nitrates
	Days	sample 1	sample 2	Av	SD
	0	75.3	77.4	76.35	1.05
	2	32.5	36.2	34.35	1.85
	3	21.8	20.87	21.335	0.465
	4	20.7	19.33	20.015	0.685
	5	19.9	18.64	19.27	0.63
	7	11.3	11.98	11.64	0.34
	9	11.4	12.3	11.85	0.45
	10	11.7	10.45	11.075	0.625
	11	12.1	11.3	11.7	0.4
	12	10.9	10.32	10.61	0.29
	14	12.8	9.3	11.05	1.75
	15	10.3	10.8	10.55	0.25
	16	11.6	11.2	11.4	0.2
	17	12.1	11.23	11.665	0.435
	18	13.3	12.6	12.95	0.35
	19	13.9	12.65	13.275	0.625
	21	13.7	13.8	13.75	0.05
	22	14.6	13.92	14.26	0.34
	23	14.4	13.6	14	0.4
	24	14.29	13.87	14.08	0.21
	25	7.3	6.66	6.98	0.32
	26	6.5	5.49	5.995	0.505
	28	4.48	3.89	4.185	0.295
	30	4.29	3.65	3.97	0.32

## Sheet: Figure 5
	Biomass fed batch g/L						Biomass batch g/L
	Days	sample 1	sample 2	Av	Dv		Days	sample 1	sample 2	sample 3	Av	Dv
	0	0.08	0.08	0.08	0		0	0.084	0.082	0.087	0.0843333	0.0020548
	2	0.16	0.14	0.15	0.01		2	0.11	0.13	0.12	0.12	0.00816497
	3	0.25	0.26	0.255	0.005		4	0.13	0.15	0.12	0.133333	0.0124722
	4	0.37	0.43	0.4	0.03		6	0.15	0.15	0.14	0.146667	0.00471405
	5	0.49	0.55	0.52	0.03		8	0.17	0.17	0.16	0.166667	0.00471405
	7	0.63	0.7	0.665	0.035		10	0.24	0.23	0.25	0.24	0.00816497
	9	0.75	0.83	0.79	0.04		12	0.36	0.36	0.34	0.353333	0.00942809
	10	0.84	0.88	0.86	0.02		14	0.53	0.55	0.55	0.543333	0.00942809
	11	0.98	1.19	1.085	0.105		16	0.63	0.6	0.65	0.626667	0.020548
	12	1.09	1.3	1.195	0.105		18	0.78	0.79	0.7	0.756667	0.0402768
	14	1.23	1.31	1.27	0.04		22	0.95	0.93	0.95	0.943333	0.00942809
	15	1.36	1.38	1.37	0.01		24	1.08	1.1	1.09	1.09	0.00816497
	16	1.41	1.5	1.455	0.045		26	1.35	1.33	1.36	1.34667	0.0124722
	17	1.5	1.58	1.54	0.04		28	1.48	1.39	1.48	1.45	0.0424264
	18	1.63	1.68	1.655	0.025		31	1.53	1.55	1.56	1.54667	0.0124722
	19	1.7	1.78	1.74	0.04		32	1.62	1.64	1.63	1.63	0.00816497
	21	1.79	1.87	1.83	0.04		33	1.75	1.69	1.66	1.7	0.0374166
	22	1.81	1.9	1.855	0.045		34	1.78	1.73	1.7	1.73667	0.0329983
	23	1.85	1.95	1.9	0.05		35	1.87	1.78	1.81	1.82	0.0374166
	24	1.89	1.97	1.93	0.04		36	1.88	1.89	1.89	1.88667	0.00471405
	25	1.94	2.1	2.02	0.08		39	2.13	2.01	1.92	2.02	0.0860233
	26	2.01	2.18	2.095	0.085		40	2.2	2.12	2.08	2.13333	0.0498888
	28	2.19	2.22	2.205	0.015
	30	2.25	2.37	2.31	0.06

## Sheet: Figure 6
	Qx	sample 1 g/L	Qx 1	sample 2 g/L	Qx 2	sample 3 g/L	Qx 3	av biomass	av Qx	sd
	HB	2.2	0.055	2.12	0.053	2.08	0.052	2.13333	0.0533333	0.00124722
	HFB	2.25	0.075	2.37	0.079			2.31	0.077	0.002
	SGR	SGR 1	SGR2	SGR3	Av	SD
	HB	0.00340145	0.00338797	0.00330647	0.0033653	4.19586e-05
	HFB	0.00463425	0.00470641		0.00467033	5.10293e-05
	Qp	Average	SD	sample 1 g/L	gluc 1	Qp 1	sample 2 g/L	gluc 2	Qp 2	sample 3 g/L	gluc 3	Qp 3	av biomass	av Qp	sd
	HB	0.0041	0.0002	2.2	0.0822	0.004521	2.12	0.0789	0.0041817	2.08	0.0802	0.0041704	2.13333	0.00429103	0.000162676
	HFB	0.00596	0.0002	2.25	0.0814	0.006105	2.37	0.0771	0.0060909				2.31	0.00609795	7.05e-06
	Yxs	sample 1 g/L	nitrates 1	Yield 1	sample 2 g/L	nitrates 2	Yield 2	sample 3 g/L	nitrates 3	Yield 3	av biomass	av nitrates	yield average	SD
	HB	2.2	736.923	2.98539	2.12	744.231	2.84858	2.08	743.268	2.79845	2.13333	741.474	2.87747	0.0790024
	HFB	2.25	744	3.02419	2.37	744	3.18548				2.31	744	3.10484	0.0806452

## Sheet: Sup Fig
	Time	Gluc 1	Gluc 2	Gluc 3	Gluc 4	PROM	SD
	EXP	5.33342	4.99847	4.82221	5.06606	5.05504	0.18373
	0 DN	5.39978	5.33366	5.69347	5.11386	5.38519	0.207079
	1 DN	6.21476	5.9538	6.03274	5.76715	5.99211	0.160698
	2 DN	6.38729	6.28547	6.86576	6.94925	6.62194	0.289332
	4 DN	7.93951	7.88571	7.6274	7.49707	7.73742	0.182142
	8 DN	7.79628	8.14929	8.08184	8.12487	8.03807	0.14167
